# Supplementary material
Source: HighWire-hosted journal article supplement (http://qualitysafety.bmj.com/highwire/filestream/161688/field_highwire_adjunct_files/0/bmjqs-2021-014329supp001_data_supplement.pdf)
Supplement: bmjqs-2021-014329supp001_data_supplement.pdf [file bmjqs-2021-014329supp001_data_supplement.pdf]

# Surveys

---

## 1 Survey questions for women

### 1. Are you over the age of 16?

☐ Yes ☐ No

### 2. Are you pregnant now?

If YES, how many weeks pregnant are you?

[Numerical answer]

If NO, how recently have you been pregnant?

[Numerical answer]

### 3. How many children do you have?

[Numerical answer]

### 4. How many pregnancies have you had?

[Numerical answer]

**5. Has your antenatal care for this pregnancy so far:**

- ☐ Been provided mostly face-to-face
- ☐ Been provided mostly remotely (for example, phone, video, text)
- ☐ Been provided a mix of face-to-face and remotely

**6. Do/did you feel safe receiving remote/face to face antenatal care during the coronavirus pandemic?**

- ☐ Completely safe
- ☐ Reasonably safe
- ☐ Not at all safe

**7. Routine parts of your antenatal care include your booking appointment, regular check-up appointments, mental health check and particular measurements like blood pressure.**

**Please indicate which, if any, have taken place remotely (over the phone or via video call)**

Free text

**Please indicate which, if any, have taken place at your home**

Free text

**Please indicate which, if any, have not taken place which should have (this may be due to missed appointments, cancellations or appointments that were not scheduled)**

Free text

**8. In relation to your antenatal care, do you have a preference for one way of communicating over another?**

- ☐ Prefer phone calls
- ☐ Prefer video calls
- ☐ Prefer in-person
- ☐ Prefer a mix, depending on the appointment
- ☐ No preference

**9. What is good about having antenatal care remotely?**

Free text

**10. What do you think are the downsides of receiving remote antenatal care, including any concerns you may have?**

Free text

**11. What are your ideas on how remote antenatal care could be improved?**

Free text

**12. Do you have any underlying health conditions, e.g. diabetes?**

Free text

**13. Any other issues you would like to raise about antenatal care during a pandemic?**

Free text

**14. In which setting would you like to give birth?**

- ☐ Home
- ☐ Midwife led birth centre
- ☐ Midwife birth centre in hospital
- ☐ Labour ward

**15. Would you like to be considered for an interview to discuss antenatal care (Task 2 of this study)?**

Yes ☐ No ☐

**16. Age**

[Numerical answer]

**17. Postcode**

[Postcode answer]

**18. Gender you identify as**

☐ Female ☐ Male ☐ Other ☐ Prefer not to say

**19. Ethnicity** (Please tick the number that best describes your ethnic group or background):

☐ Prefer not to say

**White**

- 1. English / Welsh / Scottish / Northern Irish / British
- 2. Irish
- 3. Gypsy or Irish Traveller
- 4. Any other White background, please describe

**Mixed / Multiple ethnic groups**

- 5. White and Black Caribbean
- 6. White and Black African
- 7. White and Asian
- 8. Any other Mixed / Multiple ethnic background, please describe

**Asian / Asian British**

- 9. Indian
- 10. Pakistani
- 11. Bangladeshi
- 12. Chinese
- 13. Any other Asian background, please describe

**Black / African / Caribbean / Black British**

- 14. African
- 15. Caribbean
- 16. Any other Black / African / Caribbean background, please describe

**Other ethnic group**

- 17. Arab
- 18. Any other ethnic group, please describe

**Disability:** Do you have a longstanding (more than 6 months) illness, disability or impairment which causes substantial difficulty with day to day activities? Yes ☐ No ☐

## 2 Survey questions for healthcare professionals

### 1. Can you describe your professional role?

*You may tick more than one box*

- ☐ I work clinically in the NHS
- ☐ I work in the NHS in a non-clinical role
- ☐ I have a senior leadership position (e.g. board, director, or executive level) in an NHS trust, Clinical Commissioning Group or other local/regional NHS organisation
- ☐ I work for/have a position on a national body
- ☐ Other (please state)

### 2. If you provide antenatal care, what approaches have you or your organisation used during the Covid-19 pandemic?

- ☐ Care been provided mostly face-to-face
- ☐ Care been provided mostly remotely (for example, phone, video, text)
- ☐ Care been provided a mix of face-to-face and remotely

### 3. In providing antenatal care, do you have a preference for one way of communicating over another?

- ☐ Care provided mostly face-to-face
- ☐ Care provided mostly remotely (for example, phone, video, text)
- ☐ Care provided a mix of face-to-face and remotely

### 4. Which aspects of antenatal care have been delivered remotely to women?

Free text

### 5. What's good about providing antenatal care remotely?

Free text

### 6. What has gone well with providing remote antenatal care?

Free text

### 7. What are the downsides of providing remote antenatal care, including any concerns you may have?

Free text

### 8. What safety concerns have you had related to antenatal care during the pandemic?

Free text

**9. What are your ideas about how remote antenatal care could be improved?**

Free text

**10. Any other issues you would like to raise about antenatal care during a pandemic?**

Free text

**11. Postcode of your place of work**

[Postcode answer]

**12. Gender you identify as**☐ Female ☐ Male ☐ Other ☐ Prefer not to say**13. Ethnicity** (Please tick the number that best describes your ethnic group or background):☐ Prefer not to say**White**

1. English / Welsh / Scottish / Northern Irish / British
2. Irish
3. Gypsy or Irish Traveller
4. Any other White background, please describe

**Mixed / Multiple ethnic groups**

5. White and Black Caribbean
6. White and Black African
7. White and Asian
8. Any other Mixed / Multiple ethnic background, please describe

**Asian / Asian British**

9. Indian
10. Pakistani
11. Bangladeshi
12. Chinese
13. Any other Asian background, please describe

**Black / African / Caribbean / Black British**

14. African
15. Caribbean
16. Any other Black / African / Caribbean background, please describe

**Other ethnic group**

17. Arab
18. Any other ethnic group, please describe

**Disability:** Do you have a longstanding (more than 6 months) illness, disability or impairment which causes substantial difficulty with day to day activities? Yes ☐ No ☐



## 3 Survey questions for managers

### 1. Can you describe your professional role?

- ☐ I work clinically in the NHS
- ☐ I work in the NHS in a non-clinical role
- ☐ I have a senior leadership position (e.g. board, director, or executive level) in an NHS trust, Clinical Commissioning Group or other local/regional NHS organisation
- ☐ I work for/have a position on a national body
- ☐ Other (please state)

### 2. If you are involved in leading changes around the provision of antenatal care, what approaches have your services used during the covid-19 pandemic?

- ☐ Care been provided mostly face-to-face
- ☐ Care been provided mostly remotely (for example, phone, video, text)
- ☐ Care been provided a mix of face-to-face and remotely

### 3. Which aspects of antenatal care have been delivered remotely to women in your service?

Free text

### 4. What has gone well with providing remote antenatal care from a service delivery perspective?

Free text

### 5. What do you think the downsides are of providing remote antenatal care from a service delivery perspective, including any concerns you may have on safety?

Free text

### 6. In delivering antenatal care, do you have a preference for one way of communicating with women over another?

- ☐ Care provided mostly face-to-face
- ☐ Care provided mostly remotely (for example, phone, video, text)
- ☐ Care provided a mix of face-to-face and remotely

### 7. Are/were there any safety issues raised with you about remote/reduced antenatal care during the coronavirus pandemic? What were these?

Free text

### 8. How could remote antenatal care be improved?

Free text



**9. Any other issues you would like to raise about antenatal care during a pandemic?**

Free text

**10. Postcode of your place of work**

[Postcode answer]

**11. Gender you identify as**☐ Female ☐ Male ☐ Other ☐ Prefer not to say**12. Ethnicity** (Please tick the number that best describes your ethnic group or background):☐ Prefer not to say**White**

1. English / Welsh / Scottish / Northern Irish / British
2. Irish
3. Gypsy or Irish Traveller
4. Any other White background, please describe

**Mixed / Multiple ethnic groups**

5. White and Black Caribbean
6. White and Black African
7. White and Asian
8. Any other Mixed / Multiple ethnic background, please describe

**Asian / Asian British**

9. Indian
10. Pakistani
11. Bangladeshi
12. Chinese
13. Any other Asian background, please describe

**Black / African / Caribbean / Black British**

14. African
15. Caribbean
16. Any other Black / African / Caribbean background, please describe

**Other ethnic group**

17. Arab
18. Any other ethnic group, please describe

**Disability:** Do you have a longstanding (more than 6 months) illness, disability or impairment which causes substantial difficulty with day to day activities? Yes ☐ No ☐
